# Supplementary material for: Grief reaction and psychosocial impacts of child death and stillbirth on bereaved North Indian parents: A qualitative study
Source: PubMed Central journal article supplement (PMC7840017; doi:10.1371/journal.pone.0240270), 2021-01-27
Supplement: pone.0240270.s005.pdf [file pone.0240270.s005.pdf]

**Supplementary document 5**  
**Causes of death in children and neonates**

| <b>Sl. No.</b>  | <b>Participant ID</b> | <b>Diagnosis (as per the hospital records)</b>                      |
|-----------------|-----------------------|---------------------------------------------------------------------|
| <b>Children</b> |                       |                                                                     |
| 1               | Child 1               | Meningitis                                                          |
| 2               | Child 2               | Congenital heart disease (ventricular septal defect) with pneumonia |
| 3               | Child 3               | Pneumonia                                                           |
| 4               | Child 4               | Pneumonia with septic shock                                         |
| 5               | Child 5               | Pneumonia                                                           |
| 6               | Child 6               | Congenital cyanotic heart disease with pneumonia                    |
| 7               | Child 7               | Pneumonia                                                           |
| 8               | Child 8               | Hepatic encephalopathy                                              |
| 9               | Child 9               | Malaria and Encephalopathy                                          |
| 10              | Child 10              | Acute gastroenteritis, severe dehydration and septic shock          |
| 11              | Child 11              | Recurrent pneumonia                                                 |
| 12              | Child 12              | Renal failure                                                       |
| 13              | Child 13              | Severe anaemia under investigation                                  |
| <b>Neonates</b> |                       |                                                                     |
| 14              | Neonate 1             | Term newborn with hypoxic ischemic encephalopathy-stage 3           |
| 15              | Neonate 2             | Pneumonia                                                           |
| 16              | Neonate 3             | Septic shock                                                        |
| 17              | Neonate 4             | Sepsis with meningitis                                              |
| 18              | Neonate 5             | Meningitis                                                          |
| 19              | Neonate 6             | Septic shock                                                        |
| 20              | Neonate 7             | Preterm, extremely low birthweight with sepsis                      |
| 21              | Neonate 8             | Sepsis with meningitis                                              |
| 22              | Neonate 9             | Sepsis with pneumonia                                               |
| 23              | Neonate 10            | Septic shock                                                        |
| 24              | Neonate 11            | Sepsis with pneumonia                                               |
| 25              | Neonate 12            | Septic shock                                                        |
