# Supplementary material for: Grief reaction and psychosocial impacts of child death and stillbirth on bereaved North Indian parents: A qualitative study
Source: PubMed Central journal article supplement (PMC7840017; doi:10.1371/journal.pone.0240270), 2021-01-27

## Coding Tree

### 1. Grief anticipation and expression

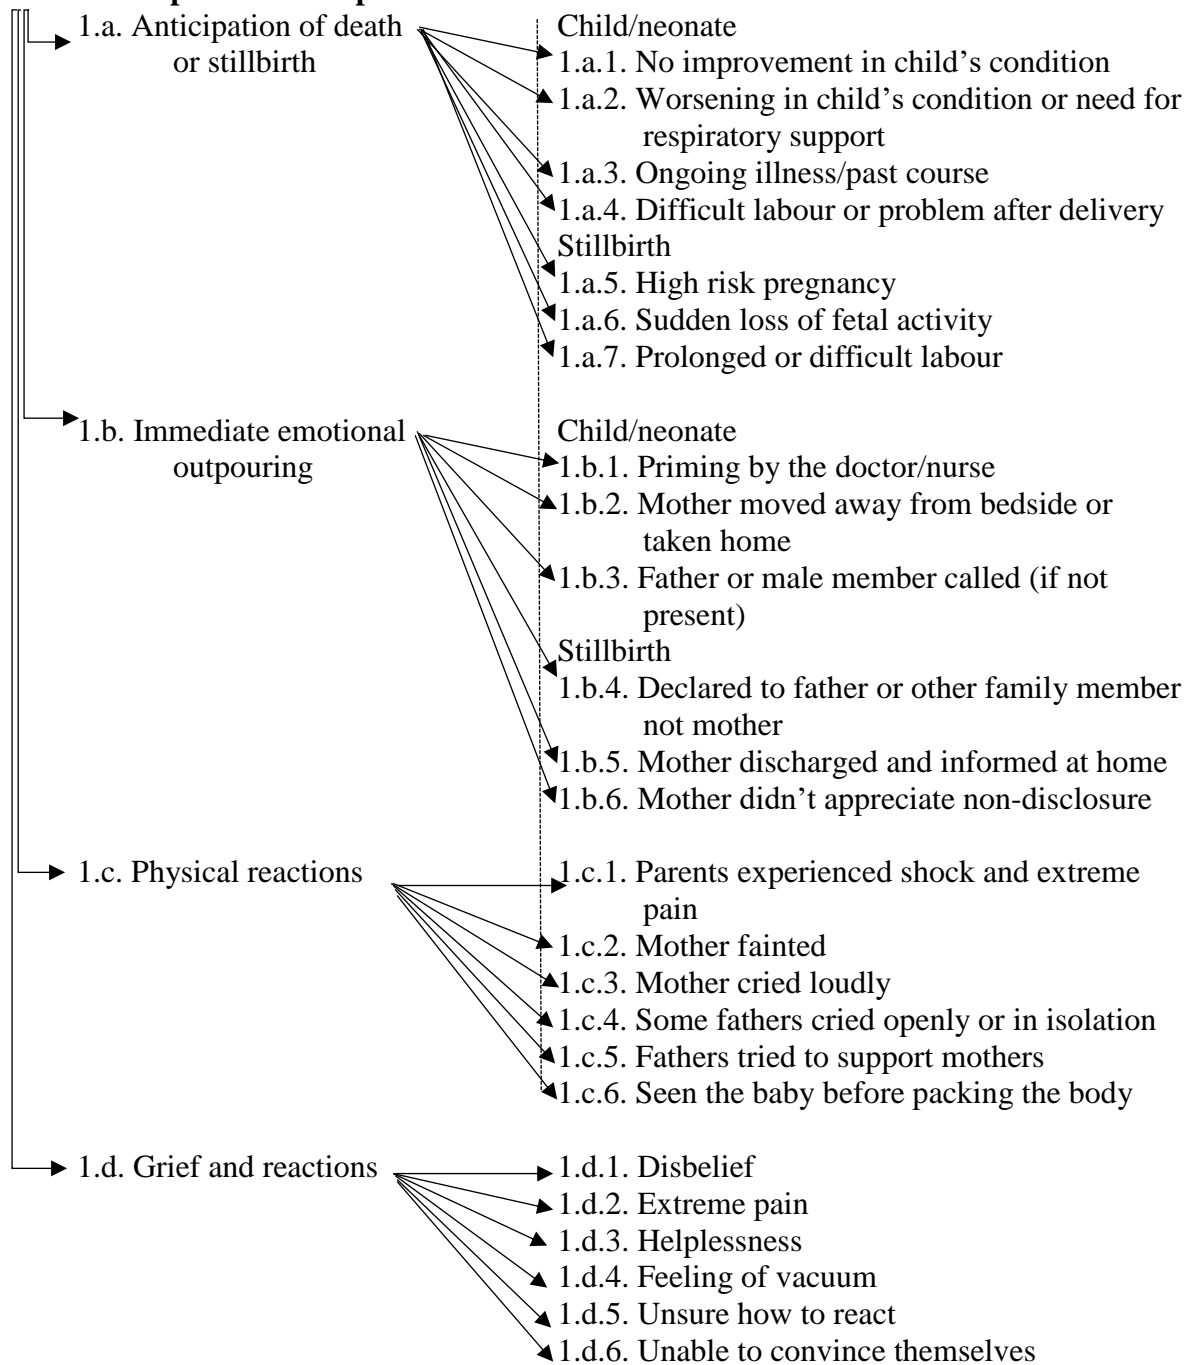

## 2. Impact of the bereavement

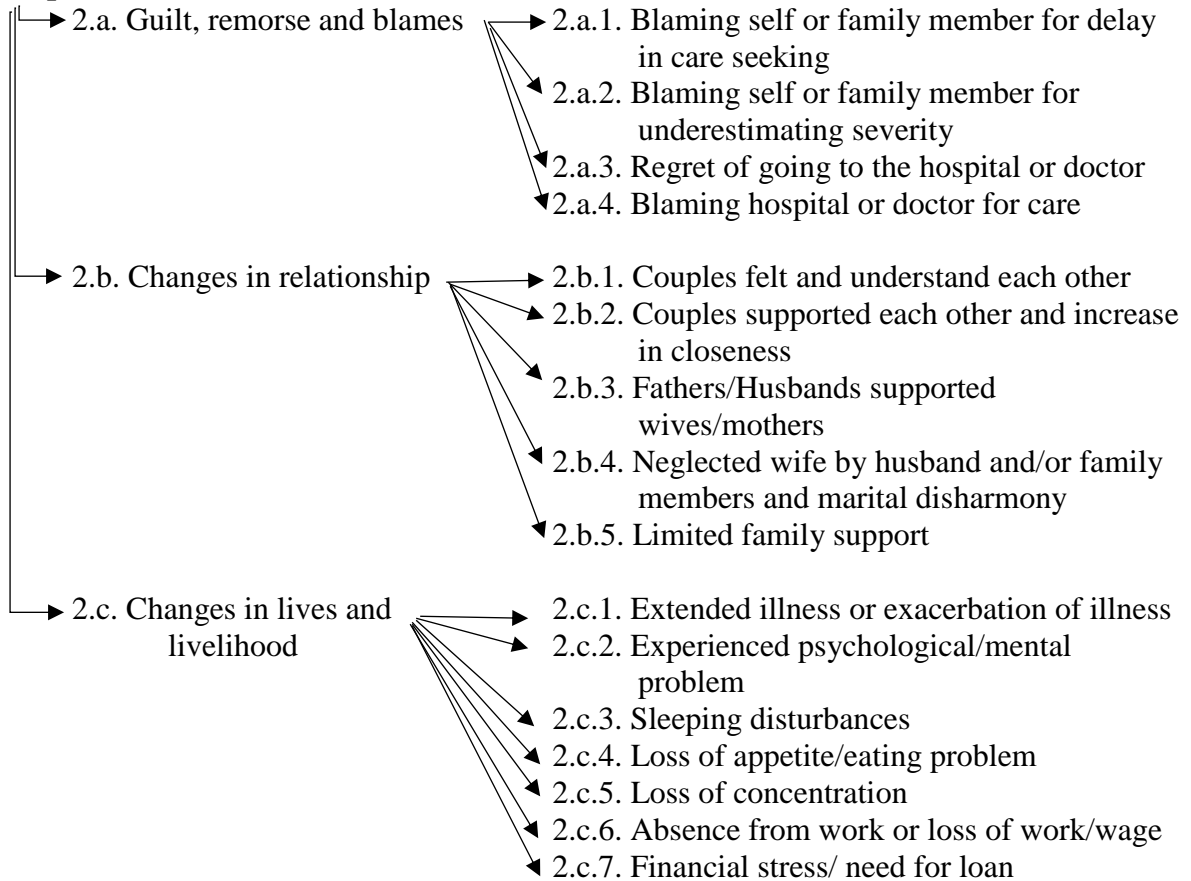

## 3. Coping mechanism

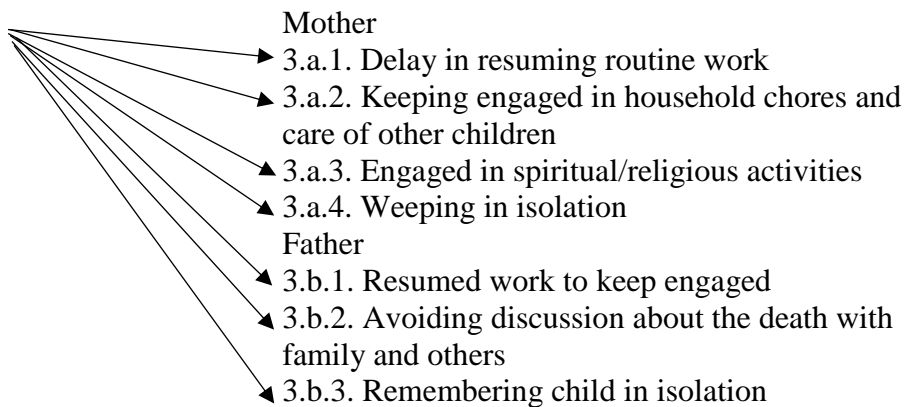

## 4. Sociocultural norms and practices

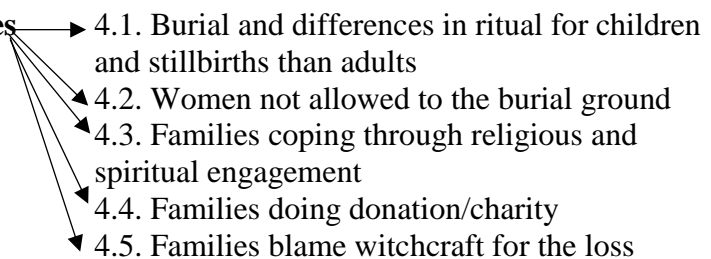

Supplement: pone.0240270.s006.pdf [file pone.0240270.s006.pdf]
